# Supplementary material for: Identification of SNAT Family Genes Suggests GhSNAT3D Functional Reponse to Melatonin Synthesis Under Salinity Stress in Cotton
Source: Front Mol Biosci. 2022 Feb 10;9:843814. doi: 10.3389/fmolb.2022.843814 (PMC8867073; doi:10.3389/fmolb.2022.843814)
Supplement: Supplementary file 1 [file Table2.XLSX]

## Sheet: xlsWorksheetName
Gene	Principle Transcript ID	Protein Length (aa)	Molecular Weight (kDa)	Isoelectric Point	Subcellular localization
GhSNAT1A	GH_A01G1400.1	157	17.79	7.305	chlo
GhSNAT2A	GH_A02G0352.1	186	21.229	6.524	chlo
GhSNAT3A	GH_A02G0923.1	247	27.873	5.962	chlo
GhSNAT4A	GH_A02G1769.1	610	66.864	8.019	chlo
GhSNAT5A	GH_A04G0241.1	162	18.353	9.369	cyto
GhSNAT6A	GH_A05G2788.1	294	32.23	9.512	chlo
GhSNAT7A	GH_A06G0759.1	468	52.979	6.459	cyto
GhSNAT8A	GH_A07G0600.1	565	63.699	8.73	cyto
GhSNAT9A	GH_A07G1850.1	195	22.003	5.083	cyto
GhSNAT10A	GH_A07G2636.1	170	19.662	8.059	cyto
GhSNAT11A	GH_A08G0730.1	174	20.387	8.595	chlo
GhSNAT12A	GH_A08G0946.1	164	18.403	8.565	cyto
GhSNAT13A	GH_A08G2125.1	176	20.644	8.589	chlo
GhSNAT14A	GH_A08G2290.1	378	43.006	9.713	cyto
GhSNAT15A	GH_A08G2523.1	277	31.753	9.064	chlo
GhSNAT16A	GH_A10G0898.1	609	67.138	8.111	chlo
GhSNAT17A	GH_A11G0382.1	564	63.42	8.731	cyto
GhSNAT18A	GH_A11G1315.1	558	61.893	6.375	nucl
GhSNAT19A	GH_A11G1409.1	207	23.377	8.185	chlo
GhSNAT20A	GH_A11G2271.1	601	66.057	7.049	cyto
GhSNAT21A	GH_A11G2363.1	236	27.083	8.886	chlo
GhSNAT22A	GH_A13G0575.1	159	18.21	9.582	cysk
GhSNAT23A	GH_A13G1257.1	176	20.143	6.777	cyto
GhSNAT24A	GH_A13G2616.1	383	43.293	9.898	cyto
GhSNAT1D	GH_D01G1482.1	157	17.718	7.79	chlo
GhSNAT2D	GH_D02G0376.1	186	21.223	6.27	cyto
GhSNAT3D	GH_D02G1113.1	247	27.859	5.962	chlo
GhSNAT4D	GH_D02G1803.1	310	35.503	8.189	nucl
GhSNAT5D	GH_D03G0290.1	607	66.875	8.118	mito
GhSNAT6D	GH_D03G0732.1	164	18.507	8.565	cyto
GhSNAT7D	GH_D05G2800.1	294	32.467	9.974	chlo
GhSNAT8D	GH_D06G0736.1	468	53.039	6.076	cyto
GhSNAT9D	GH_D07G0605.1	552	62.067	8.541	cyto
GhSNAT10D	GH_D07G1828.1	195	22.057	5.083	cyto
GhSNAT11D	GH_D07G2578.1	170	19.696	8.059	cyto
GhSNAT12D	GH_D08G0723.1	174	20.365	8.176	chlo
GhSNAT13D	GH_D08G0969.1	278	31.004	6.774	chlo
GhSNAT14D	GH_D08G1037.1	164	18.432	9.046	cyto
GhSNAT15D	GH_D08G2144.1	176	20.639	8.028	chlo
GhSNAT16D	GH_D08G2296.1	378	42.928	9.763	cyto
GhSNAT17D	GH_D08G2530.1	277	31.724	9.076	nucl
GhSNAT18D	GH_D09G2252.1	171	19.353	9.866	chlo
GhSNAT19D	GH_D10G1066.1	591	65.235	8.413	chlo
GhSNAT20D	GH_D11G0399.1	564	63.408	8.637	cyto
GhSNAT21D	GH_D11G1345.1	558	61.814	6.213	nucl
GhSNAT22D	GH_D11G1445.1	207	23.449	7.973	chlo
GhSNAT23D	GH_D11G2394.1	236	26.91	8.75	nucl
GhSNAT24D	GH_D13G0686.1	159	18.136	9.907	cysk
GhSNAT25D	GH_D13G0943.1	173	19.608	10.08	mito
GhSNAT26D	GH_D13G1059.1	173	19.423	6.937	nucl
GhSNAT27D	GH_D13G1193.1	176	20.193	7.502	cysk
GhSNAT28D	GH_D13G2606.1	383	43.273	9.601	cyto
